# Supplementary material
Source: publisher figshare collection journal article supplement (https://gsajournals.figshare.com/articles/dataset/_/14736564)
Supplement: Supplementary file 1 [file 1]

# Package ‘diaQTL’

June 1, 2021

**Title** QTL Analysis in Diallel Populations

**Version** 1.00

**Author** Jeffrey B. Endelman and Rodrigo R. Amadeu

**Maintainer** Jeffrey Endelman <endelman@wisc.edu>

**Description** QTL analysis of diploid and autotetraploid diallel populations. Phenotypes are regressed on genotype probabilities, and the regression coefficients are random effects.

**Depends** R (>= 4.0)

**License** GPL-3 + file LICENSE

**LazyData** true

**RoxygenNote** 7.1.1

**Roxygen** list(markdown = TRUE)

**Encoding** UTF-8

**Imports** BGLR, ggplot2, methods, coda, Matrix, scam, parallel, arrangements, tidyr, ggfittext, ggden-  
dro, labeling, rlang, reshape2, plyr

**Suggests** knitr, rmarkdown

**VignetteBuilder** knitr

## R topics documented:

|                                    |    |
|------------------------------------|----|
| BayesCI . . . . .                  | 2  |
| convert_mappoly . . . . .          | 3  |
| convert_onemap . . . . .           | 3  |
| convert_polyorigin . . . . .       | 4  |
| convert_rabbit . . . . .           | 5  |
| diallel_geno-class . . . . .       | 5  |
| diallel_geno_pheno-class . . . . . | 6  |
| DIC_thresh . . . . .               | 6  |
| diplo_freq . . . . .               | 7  |
| diplo_get . . . . .                | 8  |
| F1codes . . . . .                  | 8  |
| fine_map . . . . .                 | 9  |
| fitQTL . . . . .                   | 10 |
| get_map . . . . .                  | 12 |
| haplo_cluster . . . . .            | 13 |
| haplo_freq . . . . .               | 13 |

|                          |    |
|--------------------------|----|
| haplo_get . . . . .      | 14 |
| haplo_plot . . . . .     | 15 |
| IBDmat . . . . .         | 16 |
| phased_parents . . . . . | 17 |
| read_data . . . . .      | 17 |
| S1codes . . . . .        | 19 |
| scan1 . . . . .          | 19 |
| scan1_permute . . . . .  | 20 |
| scan1_summary . . . . .  | 21 |
| set_params . . . . .     | 22 |

|              |           |
|--------------|-----------|
| <b>Index</b> | <b>25</b> |
|--------------|-----------|

---

BayesCI

*Bayesian Credible Interval for QTL position*

---

## Description

Bayesian Credible Interval for QTL position

## Usage

```
BayesCI(scan1_data, data, chrom, CI.prob = 0.9)
```

## Arguments

|            |                                                   |
|------------|---------------------------------------------------|
| scan1_data | data frame output from scan1                      |
| data       | variable of class <code>diallel_geno_pheno</code> |
| chrom      | chromosome                                        |
| CI.prob    | probability for the credible interval             |

## Details

Parameter `CI.prob` sets the probability for the Bayesian credible interval (e.g., 0.90, 0.95) using the profile likelihood (posterior mean).

## Value

subset of `scan1_data` with markers in the CI

## Examples

```
## Not run:
  BayesCI(scan1_example, diallel_example, chrom="10", CI.prob=0.9)

## End(Not run)
```

---

|                 |                                                 |
|-----------------|-------------------------------------------------|
| convert_mappoly | <i>Generate diaQTL input files from MAPpoly</i> |
|-----------------|-------------------------------------------------|

---

**Description**

Generate diaQTL input files from a list of 'mappoly.genoprob' object class of MAPpoly R package (version >0.2.3). It only works for autotetraploid data.

**Usage**

```
convert_mappoly(data, digits = 4, ploidy = 4, outstem = "")
```

**Arguments**

|         |                                                                    |
|---------|--------------------------------------------------------------------|
| data    | list of mappoly.genoprob object class (one for each linkage group) |
| digits  | how many rounding digits for the probabilities output (default=4)  |
| ploidy  | Either 2 or 4 (default=4)                                          |
| outstem | prefix for the pedigree and genotype files for diaQTL              |

**Examples**

```
## Not run:
# see MAPpoly tutorial for details on its functions
MAP <- list(lg1, lg2, lg3) #your map with your linkage groups
genoprob <- vector("list", 3) #if 3 linkage groups
for(i in 1:length(genoprob))
  genoprob[[i]] <- mappoly::calc_genoprob_error(input.map = MAP[[i]], error = 0.05)
convert_mappoly(genoprob, ploidy=4)

## End(Not run)
```

---

|                |                                                |
|----------------|------------------------------------------------|
| convert_onemap | <i>Generate diaQTL input files from OneMap</i> |
|----------------|------------------------------------------------|

---

**Description**

Generate diaQTL input files from 'onemap\_progeny\_haplotypes' object class of OneMap R package (version >2.2.0)

**Usage**

```
convert_onemap(data, digits = 4, outstem = "")
```

**Arguments**

|         |                                                                   |
|---------|-------------------------------------------------------------------|
| data    | onemap_progeny_haplotypes object class                            |
| digits  | how many rounding digits for the probabilities output (default=4) |
| outstem | prefix for the pedigree and genotype files for diaQTL             |

## Examples

```
## Not run:
map <- list(LG1_final, LG2_final)
progeny_haplot <- onemap::progeny_haplotypes(map,
                                             most_likely = FALSE,
                                             ind = "all")

convert_onemap(progeny_haplot)

## End(Not run)
```

---

|                    |                                                         |
|--------------------|---------------------------------------------------------|
| convert_polyorigin | <i>Create diaQTL input files from PolyOrigin output</i> |
|--------------------|---------------------------------------------------------|

---

## Description

Create diaQTL input files from PolyOrigin output

## Usage

```
convert_polyorigin(
  filename,
  mapfile = NULL,
  remove.outliers = TRUE,
  outstem = ""
)
```

## Arguments

|                 |                                                                           |
|-----------------|---------------------------------------------------------------------------|
| filename        | Name of polyancestry file                                                 |
| mapfile         | Optional name of CSV file containing the physical map (marker, chrom, bp) |
| remove.outliers | Should offspring flagged as outliers be removed (default is TRUE)         |
| outstem         | prefix for output filenames                                               |

## Details

Creates the pedigree (diaQTL\_pedfile.csv) and genotype (diaQTL\_genofile.csv) input files needed for [read\\_data](#) from the polyancestry output file generated by the PolyOrigin software. PolyOrigin outputs a genetic map in cM. To add a physical map in bp, use the option mapfile. The input file needed for [phased\\_parents](#) (diaQTL\_parents.csv) is also created.

---

|                |                                                                 |
|----------------|-----------------------------------------------------------------|
| convert_rabbit | <i>Generate diaQTL input files from RABBIT MagicReconstruct</i> |
|----------------|-----------------------------------------------------------------|

---

### Description

Generate diaQTL input files from RABBIT MagicReconstruct

### Usage

```
convert_rabbit(rabbit.outfile, ped.file, outstem)
```

### Arguments

|                |                                                       |
|----------------|-------------------------------------------------------|
| rabbit.outfile | name of RABBIT output file                            |
| ped.file       | name of RABBIT pedigree file                          |
| outstem        | prefix for the pedigree and genotype files for diaQTL |

---

|                    |                                    |
|--------------------|------------------------------------|
| diallel geno-class | <i>S4 class with genotype data</i> |
|--------------------|------------------------------------|

---

### Description

S4 class with genotype data

### Slots

ploidy Either 2 or 4

input matrix of character strings from the genotype input file, one row per bin

Xa list of matrices (one for each offspring) with the expected haplotype dosage (rows) for each parental origin genotype (columns)

dominance Maximum dosage stored in slot geno. Integer 1-4 indicating 1 = additive, 2 = digenic dominance, 3 = trigenic dominance, 4 = quadrigenic dominance.

X.GCA Incidence matrix for GCA effects

map data frame with marker,chrom, position (cM and/or bp) and bin

geno list of length equal to the number of marker bins. Each element is a list of length dominance. The elements in the nested list are sparse matrices with dimensions (id x effects), containing the dosage for each effect.

A list with the additive relationship matrix for each chromosome

---

diallel\_geno\_pheno-class

*S4 class with genotype and phenotype data*


---

### Description

S4 class with genotype and phenotype data

### Slots

ploidy Either 2 or 4

input matrix of character strings from the genotype input file

Xa list of matrices with the expected haplotype dosage (rows) for each parental origin genotype (columns)

dominance Maximum dosage stored in slot geno. Integer 1-4 indicating 1 = additive, 2 = digenic dominance, 3 = trigenic dominance, 4 = quadrigenic dominance.

X.GCA Incidence matrix for GCA effects

map data frame with marker,chrom, position (cM and/or bp) and bin

geno list of length equal to the number of marker bins. Each element is a list of length dominance. The elements in the nested list are sparse matrices with dimensions (id x effects), containing the dosage for each effect.

A list with the additive relationship matrix for each chromosome

pheno data frame of phenotypes

X incidence matrix for fixed effects

Z incidence matrix for individuals

---

DIC\_thresh

*delta DIC thresholds for scan1*


---

### Description

delta DIC thresholds for scan1

### Usage

```
DIC_thresh(genome.size, num.parents, ploidy, alpha = 0.05, dominance = 1)
```

### Arguments

genome.size Genome size in Morgans (not centiMorgans)

num.parents Number of parents (2 to 10)

ploidy 2 or 4

alpha significance level (0.01, 0.05, 0.10, or 0.20)

dominance 1 (additive) or 2 (digenic dominance)

**Details**

Thresholds to control the genome-wide false positive rate at alpha were determined for half-diallel mating designs with up to 10 parents.

**Value**

-deltaDIC threshold

**Examples**

```
## Not run:
  DIC_thresh(genome.size=10,
             num.parents=4,
             ploidy=4,
             dominance=1,
             alpha=0.05)

## End(Not run)
```

---

|            |                              |
|------------|------------------------------|
| diplo_freq | <i>Diplotype frequencies</i> |
|------------|------------------------------|

---

**Description**

Plot the frequency of individuals with diplotype dosage above a threshold

**Usage**

```
diplo_freq(data, diplotypes, dosage, position, chrom = NULL)
```

**Arguments**

|            |                                                          |
|------------|----------------------------------------------------------|
| data       | Variable inheriting from class <code>diallel_geno</code> |
| diplotypes | Names of diplotypes                                      |
| dosage     | Dosage threshold                                         |
| position   | Either "cM" or "bp" for plotting                         |
| chrom      | Names of chromosomes (default is all)                    |

**Details**

Useful for visualizing selection in selfed populations.

**Value**

List containing

**result** Data frame with the map and frequency

**plot** ggplot object

---

|           |                                      |
|-----------|--------------------------------------|
| diplo_get | <i>Dosage of parental diplotypes</i> |
|-----------|--------------------------------------|

---

### Description

Dosage of parental diplotypes

### Usage

```
diplo_get(data, marker = NULL, id = NULL)
```

### Arguments

|        |                                                          |
|--------|----------------------------------------------------------|
| data   | Variable inheriting from class <code>diallel_geno</code> |
| marker | Name of marker                                           |
| id     | Name of individual                                       |

### Details

Function can be used to get parental diplotype dosage estimates at a single marker for all individuals (in which case `id` should be `NULL`) or for a single individual for all markers (in which case `marker` should be `NULL`)

### Value

Matrix of (id or markers) x parental diplotypes

### Examples

```
## Not run:
diplo_example = diplo_get(data = diallel_example,
                          marker = "solcap_snp_c2_25522")
diplo_example = diplo_get(data = diallel_example,
                          id = "W15263-8R")

## End(Not run)
```

---

|         |                                          |
|---------|------------------------------------------|
| F1codes | <i>Genotype codes for F1 populations</i> |
|---------|------------------------------------------|

---

### Description

Character vector with the 100 possible tetraploid genotypes for a F1 population. Maternal haplotypes are denoted 1,2,3,4 and paternal haplotypes 5,6,7,8.

### Usage

```
data(F1codes)
```



**Format**

character vector

---

|          |                                                      |
|----------|------------------------------------------------------|
| fine_map | <i>Visualize haplotype switches for fine mapping</i> |
|----------|------------------------------------------------------|

---

**Description**

Visualize haplotype switches for fine mapping

**Usage**

```
fine_map(data, haplotype, interval, trait = NULL, marker = NULL)
```

**Arguments**

|           |                                                          |
|-----------|----------------------------------------------------------|
| data      | Variable inheriting from class <code>diallel_geno</code> |
| haplotype | Name of parental haplotype                               |
| interval  | 2-vector with marker names                               |
| trait     | Name of trait to plot (optional)                         |
| marker    | Optional, marker to indicate with dashed line            |

**Details**

Function returns graphic for all individuals with a haplotype switch (defined as change in dosage from 0 to  $\geq 1$  or vice versa) for haplotype within interval. If trait is included, the trait values for each individual are displayed on the right side. The function requires map positions in bp to be included in data.

**Value**

ggplot2 variable

**Examples**

```
## Not run:
fine_map(data = diallel_example,
  haplotype = "W6511-1R.2",
  interval = c("solcap_snp_c2_40766", "solcap_snp_c1_15225"))

fine_map(data = diallel_example,
  haplotype = "W6511-1R.2",
  interval = c("solcap_snp_c2_40766", "solcap_snp_c1_15225"),
  marker = "solcap_snp_c2_25522")

## End(Not run)
```

fitQTL

*Fit multiple QTL model***Description**

Fit multiple QTL model

**Usage**

```
fitQTL(
  data,
  trait,
  qtl,
  epistasis = NULL,
  polygenic = FALSE,
  params = list(burnIn = 100, nIter = 5000),
  CI.prob = 0.9
)
```

**Arguments**

|                        |                                                                                                           |
|------------------------|-----------------------------------------------------------------------------------------------------------|
| <code>data</code>      | variable of class <code>diallel_geno_pheno</code>                                                         |
| <code>trait</code>     | name of trait                                                                                             |
| <code>qtl</code>       | data frame, see Details                                                                                   |
| <code>epistasis</code> | optional data frame, see Details                                                                          |
| <code>polygenic</code> | TRUE/FALSE whether to include additive polygenic effect                                                   |
| <code>params</code>    | list containing the number of burn-in ( <code>burnIn</code> ) and total iterations ( <code>nIter</code> ) |
| <code>CI.prob</code>   | probability for Bayesian credible interval                                                                |

**Details**

Argument `qtl` is a data frame with columns `marker` and `dominance` to specify the marker name and highest order effect (1 = additive, 2 = digenic dominance, 3 = trigenic dominance, 4 = quadrigenic dominance). All effects up to the value in `dominance` are included. Optional argument `epistasis` is a data frame with columns `marker1` and `marker2`, where each row specifies an additive x additive epistatic interaction. The number of burn-in and total iterations in `params` can be estimated using [set\\_params](#). Parameter `CI.prob` sets the probability (e.g., 0.90, 0.95) for the Bayesian credible interval for the estimated effects (to disable plotting of the CI, use `CI.prob=NULL`).

**Value**

List containing

**deltaDIC** DIC relative to model with GCA but no QTL effects**resid** residuals**var** matrix with proportion of variance for the effects**effects** list with two matrices, additive and digenic, with markers on the rows and effects on the columns**plots** list of ggplot objects, one for each marker, containing elements additive and digenic. The digenic plot has digenic effects above the diagonal and the sum of additive and digenic effects below the diagonal.

## Examples

```
## Not run:
## getting minimum burnIn and nIter for one qtl
set_params(data = diallel_example,
            trait = "tuber_shape",
            q = 0.05,
            r = 0.025,
            qtl = data.frame(marker="solcap_snp_c2_25522", dominance=2),
            polygenic = TRUE)

## additive effects
fit1 <- fitQTL(data = diallel_example,
               trait = "tuber_shape",
               params = list(burnIn=100, nIter=5000),
               qtl = data.frame(marker="solcap_snp_c2_25522", dominance=1),
               CI.prob = 0.9)

## additive + digenic dominance effects
fit2 <- fitQTL(data = diallel_example,
               trait = "tuber_shape",
               params = list(burnIn=100, nIter=5000),
               qtl = data.frame(marker="solcap_snp_c2_25522", dominance=2),
               CI.prob=0.9)

## getting minimum burnIn and nIter for two qtl with epistasis
set_params(data = diallel_example,
            trait = "tuber_shape",
            q = 0.05,
            r = 0.025,
            qtl = data.frame(marker=c("PotVar0099535", "solcap_snp_c2_25522"),
                             dominance=c(2,1)),
            epistasis = data.frame(marker1="solcap_snp_c2_25522", marker2="PotVar0099535"),
            polygenic = TRUE)

## additive + digenic dominance effects for both QTL
fit3 <- fitQTL(data = diallel_example, trait = "tuber_shape",
               params = list(burnIn=100, nIter=5000),
               qtl = data.frame(marker=c("PotVar0099535", "solcap_snp_c2_25522"),
                             dominance=c(2,2)),
               polygenic = TRUE, CI.prob = 0.9)

## additive + digenic dominance effects for both QTL + their epistatic effects
fit4 <- fitQTL(data = diallel_example, trait = "tuber_shape",
               params = list(burnIn=100, nIter=5000),
               qtl = data.frame(marker=c("PotVar0099535", "solcap_snp_c2_25522"),
                             dominance=c(2,2)),
               epistasis = data.frame(marker1="solcap_snp_c2_25522", marker2="PotVar0099535"),
               polygenic = TRUE, CI.prob = 0.9)

## additive + digenic dominance effects for three QTL + all their epistatic effects
fit5 <- fitQTL(data = diallel_example, trait = "tuber_shape",
               params = list(burnIn=100, nIter=5000),
               qtl = data.frame(marker=c("PotVar0099535",
                                         "solcap_snp_c1_6427",
                                         "solcap_snp_c2_25522"),
                             dominance=c(2,2,2)),
```

```

epistasis = data.frame(marker1=c("solcap_snp_c2_25522",
                                "solcap_snp_c2_25522",
                                "PotVar0099535"),
                        marker2=c("PotVar0099535",
                                "solcap_snp_c1_6427",
                                "solcap_snp_c1_6427")),
polygenic = TRUE, CI.prob = 0.9)

## End(Not run)

```

---

get\_map

*Get map summary from diallel\_geno object*


---

## Description

Get map summary from diallel\_geno object

## Usage

```
get_map(data, summary = TRUE)
```

## Arguments

|         |                                                                                         |
|---------|-----------------------------------------------------------------------------------------|
| data    | Variable inheriting from class <code>diallel_geno</code>                                |
| summary | logical, if TRUE (default) returns total sizes per chromosome, if FALSE returns the map |

## Value

data frame with map summary or the map

## Examples

```

## Not run:
  get_map(diallel_example)

## End(Not run)

```

---

|               |                                    |
|---------------|------------------------------------|
| haplo_cluster | <i>Cluster parental haplotypes</i> |
|---------------|------------------------------------|

---

**Description**

Cluster parental haplotypes

**Usage**

```
haplo_cluster(filename, marker, haplotypes = NULL)
```

**Arguments**

|            |                                                        |
|------------|--------------------------------------------------------|
| filename   | Name of diaQTL_parents input file                      |
| marker     | Either target marker or marker interval (see Details). |
| haplotypes | Vector of haplotype names (default is all)             |

**Details**

The argument marker can be either a single marker or vector of two markers. If a single marker, the function finds the smallest interval containing that marker such that the phased SNP haplotypes are all unique. If two markers are provided, that interval is used. Clustering utilizes hclust(method="average"). See also [phased\\_parents](#) for an additional visualization tool.

**Value**

List containing

**haplo** Data frame of haplotypes

**dendro** Dendrogram

---

|            |                              |
|------------|------------------------------|
| haplo_freq | <i>Haplotype frequencies</i> |
|------------|------------------------------|

---

**Description**

Plots the frequency of individuals with haplotype dosage above a threshold

**Usage**

```
haplo_freq(
  data,
  haplotypes,
  dosage,
  id = NULL,
  position = "cM",
  chrom = NULL,
  markers = NULL
)
```

**Arguments**

|            |                                                                                                   |
|------------|---------------------------------------------------------------------------------------------------|
| data       | Variable inheriting from class <code>diallel_geno</code>                                          |
| haplotypes | Names of haplotypes                                                                               |
| dosage     | Dosage threshold                                                                                  |
| id         | Vector of id names (default is entire population)                                                 |
| position   | Either "cM" (default) or "bp" for plotting                                                        |
| chrom      | Names of chromosomes (default is all)                                                             |
| markers    | Optional, markers to indicate with dashed line. Only available when plotting a single chromosome. |

**Details**

Useful for visualizing selection in selfed populations. For multiple chromosomes, each haplotype is shown in its own panel using `facet_wrap`. For one chromosome, the haplotypes are shown on the same set of axes.

**Value**

List containing

- result** Data frame with the map and frequency
- plot** ggplot object

---

|           |                                      |
|-----------|--------------------------------------|
| haplo_get | <i>Dosage of parental haplotypes</i> |
|-----------|--------------------------------------|

---

**Description**

Dosage of parental haplotypes

**Usage**

```
haplo_get(data, marker = NULL, id = NULL)
```

**Arguments**

|        |                                                          |
|--------|----------------------------------------------------------|
| data   | Variable inheriting from class <code>diallel_geno</code> |
| marker | Name of marker                                           |
| id     | Name of individual                                       |

**Details**

Function can be used to get parental haplotype dosage estimates at a single marker for all individuals (in which case `id` should be `NULL`) or for a single individual for all markers (in which case `marker` should be `NULL`)

**Value**

Matrix of (id or markers) x parental haplotypes

**Examples**

```
## Not run:
haplo_example = haplo_get(data = diallel_example,
                          marker = "solcap_snp_c2_25522")
haplo_example = haplo_get(data = diallel_example,
                          id = "W15263-8R")

## End(Not run)
```

haplo\_plot

*Plot parental haplotype dosage***Description**

Plot parental haplotype dosages across the chromosome for one individual

**Usage**

```
haplo_plot(data, id, chrom, position = "cM", markers = NULL)
```

**Arguments**

|          |                                                          |
|----------|----------------------------------------------------------|
| data     | Variable inheriting from class <code>diallel_geno</code> |
| id       | Name of individual(s)                                    |
| chrom    | Name of chromosome                                       |
| position | Either "cM" (default) or "bp"                            |
| markers  | Optional, markers to indicate with dashed line           |

**Details**

For "cM" plotting, only one marker per bin is displayed. For "bp" plotting, all markers are included. If multiple individuals are included in id, then the plot shows the probability that a haplotype is present in all individuals.

**Value**

ggplot object

**Examples**

```
## Not run:
haplo_plot(data = diallel_example,
           id = "W15263-8R",
           chrom = 10)

haplo_plot(data = diallel_example,
           id = "W15263-8R",
           chrom = 10,
           marker = "solcap_snp_c2_25522")

## End(Not run)
```

IBDmat

*Realized IBD relationship***Description**

Calculates realized relationship matrices from founder genotype probabilities

**Usage**

```
IBDmat(
  data,
  dominance = 1,
  epistasis = FALSE,
  spacing = 1,
  chrom = NULL,
  n.core = 1
)
```

**Arguments**

|           |                                                         |
|-----------|---------------------------------------------------------|
| data      | Variable inheriting from class <code>diallel_gen</code> |
| dominance | One of 1,2,3,4                                          |
| epistasis | TRUE/FALSE                                              |
| spacing   | spacing between marker bins, in cM                      |
| chrom     | Optional, vector of chromosome names to include         |
| n.core    | number of cores for parallel execution                  |

**Details**

Parameter dominance refers to 1 = additive, 2 = digenic, 3 = trigenic, 4 = quadrigenic. Can specify to use only a subset of the chromosomes (by default, all chromosomes are used). If epistasis is TRUE, then dominance must be 1 (additive x additive epistasis). Only pairs of markers on different chromosomes are used for epistasis.

**Value**

Relationship matrix

**Examples**

```
## Not run:
IBD_example = IBDmat(data = diallel_example, dominance=1) #additive
IBD_example = IBDmat(data = diallel_example, dominance=2) #digenic dominance
IBD_example = IBDmat(data = diallel_example, epistasis=TRUE) #additive x additive epistasis

## End(Not run)
```



---

|                |                                         |
|----------------|-----------------------------------------|
| phased_parents | <i>Visualize phased SNPs of parents</i> |
|----------------|-----------------------------------------|

---

**Description**

Visualize phased SNPs of parents

**Usage**

```
phased_parents(filename, interval, markers, parents)
```

**Arguments**

|          |                                                         |
|----------|---------------------------------------------------------|
| filename | Name of CSV input file                                  |
| interval | Vector of length 2 with the first and last marker names |
| markers  | Vector of marker names to plot                          |
| parents  | Vector of parent names to plot                          |

**Details**

The solid circles in the figure represent the allele counted by dosage.

**Value**

ggplot2 object

---

|           |                        |
|-----------|------------------------|
| read_data | <i>Read data files</i> |
|-----------|------------------------|

---

**Description**

Reads genotype, pedigree, and phenotype data files

**Usage**

```
read_data(  
  genofile,  
  ploidy = 4,  
  pedfile,  
  phenofile = NULL,  
  fixed = NULL,  
  bin.markers = TRUE,  
  dominance = NULL,  
  n.core = 1  
)
```

## Arguments

|             |                                                                                 |
|-------------|---------------------------------------------------------------------------------|
| genofile    | File with map and genotype probabilities                                        |
| ploidy      | Either 2 or 4                                                                   |
| pedfile     | File with pedigree data (id,parent1,parent2)                                    |
| phenofile   | File with phenotype data (optional)                                             |
| fixed       | If there are fixed effects, this is a character vector of "factor" or "numeric" |
| bin.markers | TRUE/FALSE whether to bin markers with the same cM position                     |
| dominance   | Maximum value of dominance that will be used for analysis. Default = ploidy.    |
| n.core      | Number of cores for parallel execution                                          |

## Details

The first 3 columns of the genotype file should be the genetic map (labeled marker, chrom, cM), and a fourth column for a reference genome position (labeled bp) can also be included. The map is followed by the members of the population. The genotype data for each marker x individual combination is a string with the format "state1state1state...=>prob1prob1prob...", where "state" refers to the genotype state and "prob" is the genotype probability in decimal format. Only states with nonzero probabilities need to be listed. The encoding for the states in tetraploids is described in the documentation for the F1codes and S1codes datasets that come with the package. For diploids, there are 4 F1 genotype codes, 1,2,3,4, which correspond to haplotype combinations 1-3,1-4,2-3,2-4, respectively; the S1 genotype codes 1,2,3 correspond to 1-1,1-2,2-2, respectively. For the phenotype file, first column is id, followed by traits, and then any fixed effects. Pass a character vector for the function argument "fixed" to specify whether each effect is a factor or numeric covariate. The number of traits is deduced based on the number of columns. Binary traits must be coded N/Y and are converted to 0/1 internally for analysis by probit regression. Missing data in the phenotype file should be coded as NA. The parameter dominance specifies the maximum value of dominance that can be used in subsequent analysis: 1 = additive, 2 = digenic dominance, 3 = trigenic dominance, 4 = quadrigenic dominance. The default is dominance = ploidy, which allows the full range of dominance models in functions such as [scan1](#) and [fitQTL](#), but this requires the most RAM. Output files from the BGLR package are stored in a folder named 'tmp' in the current directory.

## Value

Variable of class [diallel\\_geno](#) if phenofile is NULL, otherwise [diallel\\_geno\\_pheno](#)

## Examples

```
## Not run:
## Get the location of raw csv files examples
genocsv = system.file( "vignette_data", "potato_genocsv.csv", package = "diaQTL" )
pedcsv = system.file( "vignette_data", "potato_ped.csv", package = "diaQTL" )
phenocsv = system.file( "vignette_data", "potato_phenocsv.csv", package = "diaQTL" )

## Check their location in the system
print(genocsv)
print(pedcsv)
print(phenocsv)

## Load them in R
diallel_example <- read_data(genofile = genocsv,
                             ploidy = 4,
                             pedfile = pedcsv,
```

```

phenofile = phenocsv)

## End(Not run)

```

S1codes

*Genotype codes for S1 populations***Description**

Character vector with the 35 possible tetraploid genotypes for a S1 population. Haplotypes are denoted 1,2,3,4.

**Usage**

```
data(S1codes)
```

**Format**

character vector

scan1

*Single QTL scan***Description**

Performs a linear regression for each position in the map.

**Usage**

```

scan1(
  data,
  trait,
  params = list(burnIn = 100, nIter = 1000),
  dominance = 1,
  covariate = NULL,
  chrom = NULL,
  n.core = 1
)

```

**Arguments**

|           |                                                         |
|-----------|---------------------------------------------------------|
| data      | variable of class <code>diallel_geno_pheno</code>       |
| trait     | name of trait                                           |
| params    | list containing burnIn and nIter                        |
| dominance | maximum dominance for the scan, see Details             |
| covariate | optional, to include markers as covariates. See Details |
| chrom     | names of chromosomes to scan (default is all)           |
| n.core    | number of cores for parallel execution                  |

## Details

Parameter dominance has possible values of 1 = additive, 2 = digenic dominance, 3 = trigenic dominance, 4 = quadrigenic dominance. MCMC params can be estimated using [set\\_params](#). Optional argument `covariate` is used to include other markers in the model during the scan, which can improve statistical power with multiple QTL. It is a data frame with three columns: `marker` = name of the marker, `dominance` = 1 to 4, and `epistasis` = TRUE/FALSE. Function returns `deltaDIC` = DIC for the QTL model relative to null model with only GCA effects for the parents, as well as `LL` = posterior mean of the log-likelihood, which is used by [BayesCI](#).

## Value

Data frame containing the map, LL, and deltaDIC.

## Examples

```
## Not run:
## getting minimum burnIn and nIter
set_params(data = diallel_example,
            trait = "tuber_shape")

scan1_example <- scan1(data = diallel_example,
                       chrom = "10",
                       trait = "tuber_shape",
                       params = list(burnIn=60,nIter=600))

## End(Not run)
```

---

scan1\_permute

*Permutation test for scan1*

---

## Description

Permutation test for scan1

## Usage

```
scan1_permute(
  data,
  trait,
  params,
  n.permute = 1000,
  chrom = NULL,
  dominance = 1,
  covariate = NULL,
  n.core = 1
)
```

**Arguments**

|           |                                                          |
|-----------|----------------------------------------------------------|
| data      | Variable of class <code>diallel_geno_pheno</code>        |
| trait     | Name of trait                                            |
| params    | List containing burnIn and nIter                         |
| n.permute | Number of permutations                                   |
| chrom     | Names of chromosomes to scan (default is all)            |
| dominance | Dominance degree (1-4)                                   |
| covariate | optional, to include markers as covariates. See Details. |
| n.core    | Number of cores for parallel execution                   |

**Value**

Data frame with maximum LOD and minimum deltaDIC for each iteration

**Examples**

```
## Not run:
set_params(data = diallel_example,
            trait = "tuber_shape")

ans1_permut <- scan1_permute(data = diallel_example,
                             chrom = 10,
                             trait = "tuber_shape",
                             params = list(burnIn=60,nIter=600),
                             n.permute = 100)

## computing permutation threshold for alpha=0.05
quantile(ans1_permut$min_deltaDIC, 0.05)

## End(Not run)
```

---

|               |                                |
|---------------|--------------------------------|
| scan1_summary | <i>Summary of scan1 result</i> |
|---------------|--------------------------------|

---

**Description**

Summary of scan1 result

**Usage**

```
scan1_summary(scan1_data, thresh = NULL, chrom = NULL, position = "cM")
```

**Arguments**

|            |                                           |
|------------|-------------------------------------------|
| scan1_data | output from scan1                         |
| thresh     | optional -deltaDIC threshold for plotting |
| chrom      | optional, subset of chromosomes to plot   |
| position   | Either "cM" (default) or "bp"             |

**Details**

Plots the "score" (-deltaDIC) for each marker vs. genome position. The thresh argument should be a positive number.

**Value**

List containing

**peaks** data frame of markers with the highest score on each chromosome

**plot** ggplot object

**Examples**

```
## Not run:
scan1_summary( scan1_example )
scan1_summary( scan1_example, chrom = "10" )
scan1_summary( scan1_example, chrom = c( "10", "12" ) )
scan1_summary( scan1_example, chrom = "10", thresh = 20)

## End(Not run)
```

---

set\_params

Determine number of iterations for MCMC

---

**Description**

Determine number of iterations for MCMC

**Usage**

```
set_params(
  data,
  trait,
  qtl = NULL,
  epistasis = NULL,
  polygenic = FALSE,
  q = 0.5,
  r = 0.1,
  nIter = 2000
)
```

**Arguments**

|           |                                                         |
|-----------|---------------------------------------------------------|
| data      | variable of class <code>diallel_geno_pheno</code>       |
| trait     | name of trait                                           |
| qtl       | optional data frame, see Examples                       |
| epistasis | optional data frame, see Example                        |
| polygenic | TRUE/FALSE whether to include additive polygenic effect |
| q         | quantile to estimate                                    |
| r         | tolerance for quantile                                  |
| nIter     | number of iterations                                    |

## Details

Determines the burn-in and total number of iterations using the Raftery and Lewis diagnostic from R package coda, based on a 95% probability that the estimate for quantile  $q$  of the additive genetic variance is within the interval  $(q-r, q+r)$ . If `marker=NULL` (default), the first marker of each chromosome is analyzed, and the largest value across this set is returned. Parameter `dominance` specifies which genetic model (1 = additive, 2 = digenic dominance, 3 = trigenic dominance, 4 = quadrigenic dominance) to use when determining the number of iterations, but this parameter must still be specified when calling functions such as `scan1` or `fitQTL`. The default values of  $q=0.5$  and  $r=0.1$  are recommended for `scan1` based on the idea of estimating the posterior mean. For estimating the 90% Bayesian CI with `fitQTL`, suggested values are  $q=0.05$ ,  $r=0.025$ . Parameter `nIter` sets the number of iterations used to apply the Raftery and Lewis diagnostic; the default value is 2000, and if a larger number is needed, an error will be generated with this information.

## Value

matrix showing the number of burn-in and total iterations for the genetic variances in the model

## Examples

```
## Not run:
# Parameters for scan1
par1 <- set_params(data = diallel_example,
                  trait = "tuber_shape",
                  q=0.5,
                  r=0.1)

# Parameters for fitQTL (specify the position)
set_params(data = diallel_example,
          trait = "tuber_shape",
          q=0.05,
          r=0.025,
          qtl=data.frame(marker="solcap_snp_c2_25522",dominance=2))

# Parameters for fitQTL (specify the position) with polygenic effects
set_params(data = diallel_example,
          trait = "tuber_shape",
          q=0.05,
          r=0.025,
          qtl=data.frame(marker="solcap_snp_c2_25522",dominance=2),
          polygenic=TRUE)

# Parameters for fitQTL with 2 QTLs
set_params(data = diallel_example,
          trait = "tuber_shape",
          q=0.05,
          r=0.025,
          qtl=data.frame(marker=c("solcap_snp_c2_25522", "solcap_snp_c2_14750"),dominance=c(2,1)))

# Parameters for fitQTL with epistasis
set_params(data = diallel_example,
          trait = "tuber_shape",
          q=0.05,
          r=0.025,
          epistasis = data.frame(marker1="solcap_snp_c2_25522",marker2="solcap_snp_c2_14750"),
          qtl=data.frame(marker=c("solcap_snp_c2_25522", "solcap_snp_c2_14750"),dominance=c(2,1)))
```

```
## End(Not run)
```



# Index

## \* datasets

F1codes, 8

S1codes, 19

BayesCI, 2, 20

convert\_mappoly, 3

convert\_onemap, 3

convert\_polyorigin, 4

convert\_rabbit, 5

diallel\_geno, 7–9, 12, 14–16, 18

diallel\_geno (diallel\_geno-class), 5

diallel\_geno-class, 5

diallel\_geno\_pheno, 2, 10, 18, 19, 21, 22

diallel\_geno\_pheno  
(diallel\_geno\_pheno-class), 6

diallel\_geno\_pheno-class, 6

DIC\_thresh, 6

diplo\_freq, 7

diplo\_get, 8

F1codes, 8

fine\_map, 9

fitQTL, 10, 18, 23

get\_map, 12

haplo\_cluster, 13

haplo\_freq, 13

haplo\_get, 14

haplo\_plot, 15

IBDmat, 16

phased\_parents, 4, 13, 17

read\_data, 4, 17

S1codes, 19

scan1, 18, 19, 23

scan1\_permute, 20

scan1\_summary, 21

set\_params, 10, 20, 22
